# Supplementary material for: A facile chemical method to produce superparamagnetic graphene oxide–Fe3O4hybrid composite and its application in the removal of dyes from aqueous solution
Source: Royal Society of Chemistry journal article supplement (doi:10.1039/c1jm13433g), 2011-11-14
Supplement: c1jm13433g.pdf [file c1jm13433g.pdf]

## Supporting Information

### **A facile chemical method to produce superparamagnetic graphene oxide-Fe<sub>3</sub>O<sub>4</sub> hybrid composite and its application to the removal of dyes from aqueous solution**

**Guoqiang Xie<sup>a</sup>, Pinxian Xi<sup>a</sup>, Hongyan Liu<sup>a</sup>, Fengjuan Chen<sup>a</sup>, Liang Huang<sup>a</sup>,  
Yanjuan Shi<sup>a</sup>, Fengping Hou<sup>a</sup>, Zhengzhi Zeng<sup>a\*</sup>, Changwei Shao<sup>b</sup>, Jun Wang<sup>b</sup>**

<sup>a</sup> *Key Laboratory of Nonferrous Metal Chemistry and Resources Utilization of Gansu Province and State Key Laboratory of Applied Organic Chemistry and College of Chemistry and Chemical Engineering, Lanzhou University, Lanzhou 730000, P. R. China.*

<sup>b</sup> *State Key Laboratory of Advanced Ceramic Fibers & Composites, College of Aerospace and Materials Engineering, National University of Defense Technology, Changsha 410073, P. R. China.*

*E-mail: [zengzhzh@yahoo.com.cn](mailto:zengzhzh@yahoo.com.cn); [zengzhzh@lzu.edu.cn](mailto:zengzhzh@lzu.edu.cn)*

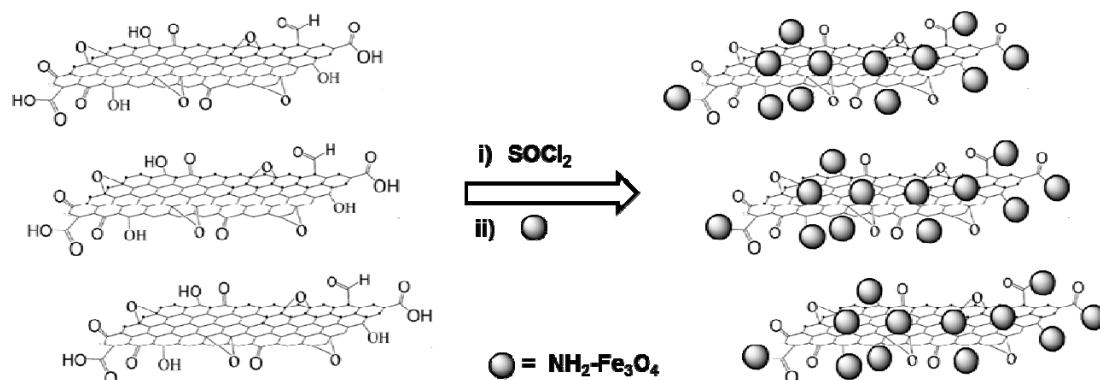

**Scheme 1.** A schematic illustration for the preparation of GO- $\text{Fe}_3\text{O}_4$  hybrid composite.

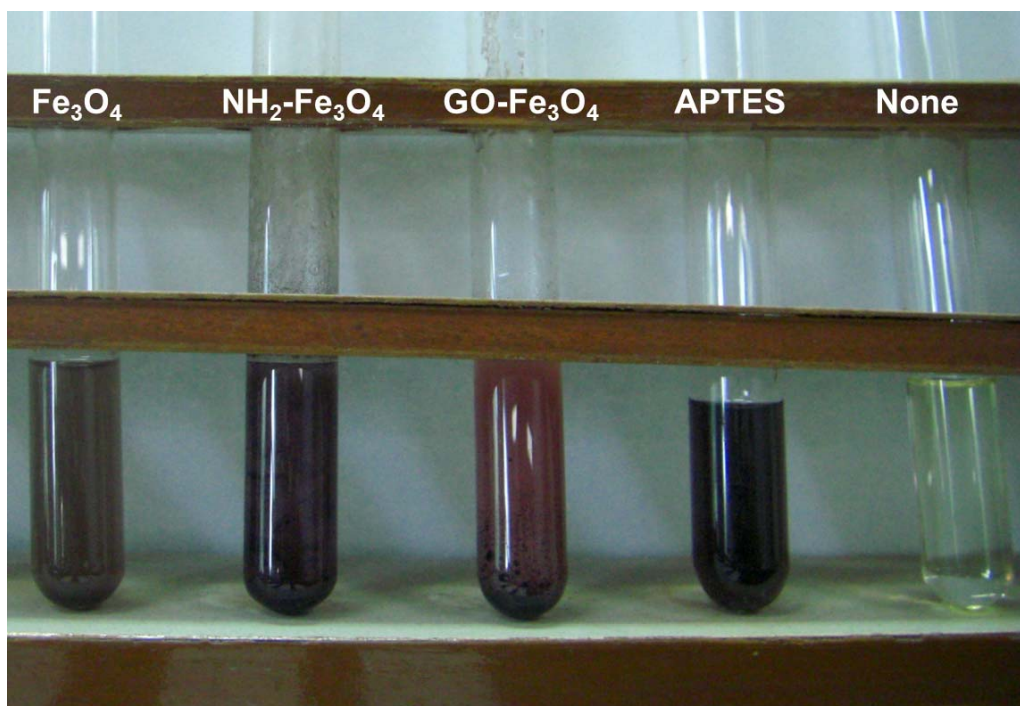

**Figure S1.** Photos of the presence or absence of primary amine groups on the surface of materials confirmed by using a Kaiser test. (Only  $\text{NH}_2\text{-Fe}_3\text{O}_4$  and APTES exhibited classic color changes)

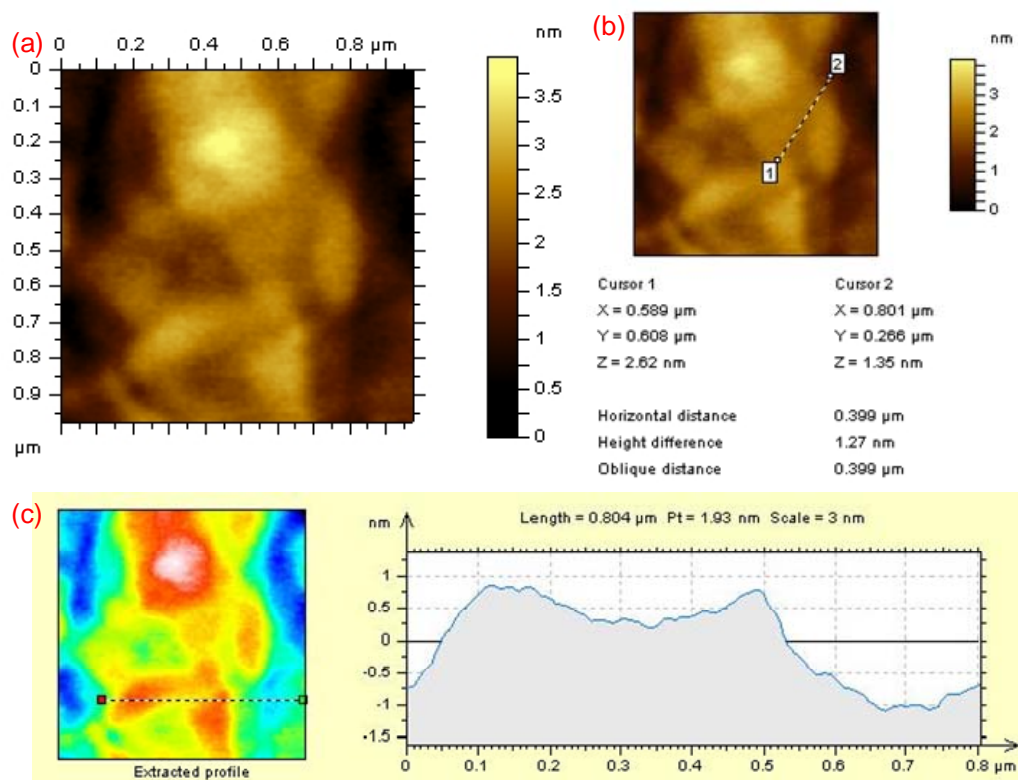

**Figure S2.** AFM images and cross-section analysis of GO

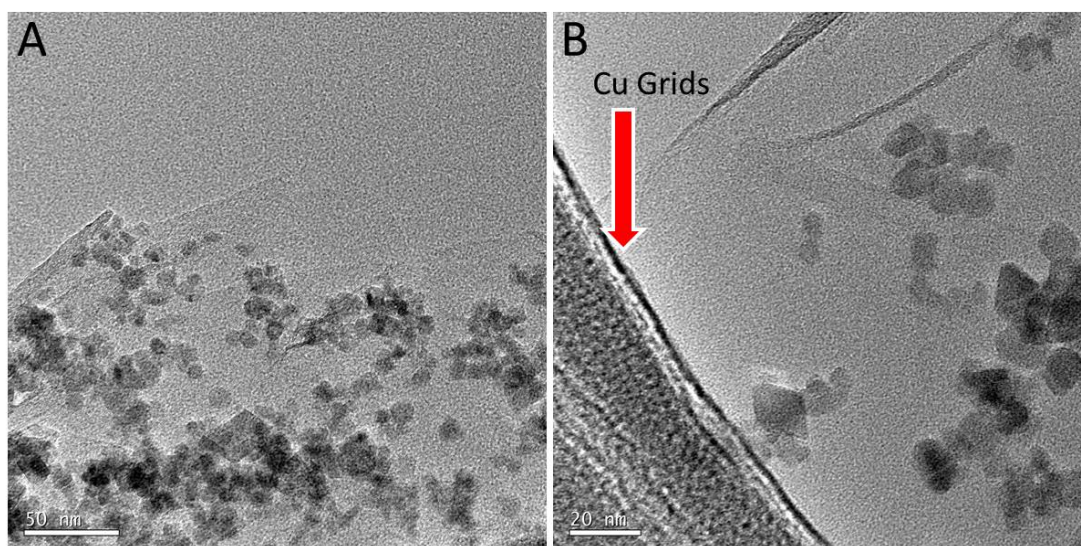

**Figure S3.** TEM images of the GO-Fe<sub>3</sub>O<sub>4</sub> hybrid composite after adsorption of Methylene Blue. (Scale bar: A: 50 nm, B: 20 nm)

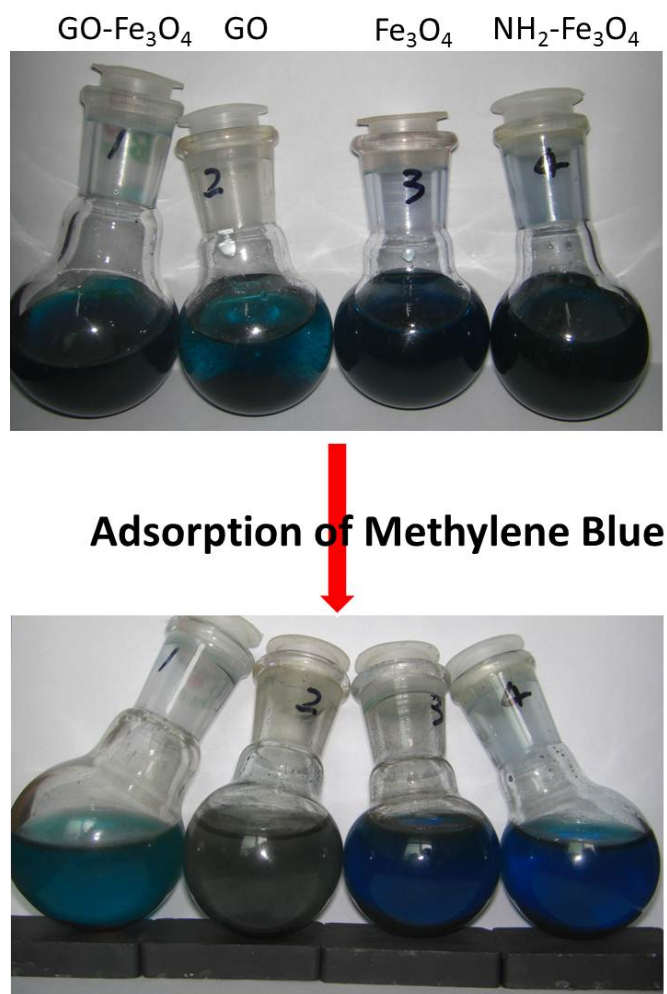

**Figure S4.** Photos of GO-Fe<sub>3</sub>O<sub>4</sub> hybrid composite, GO nanosheets, Fe<sub>3</sub>O<sub>4</sub> and NH<sub>2</sub>-Fe<sub>3</sub>O<sub>4</sub> nanoparticles responded to a magnet in MB solution before and after adsorption. Adsorption capacities for GO-Fe<sub>3</sub>O<sub>4</sub>, GO, Fe<sub>3</sub>O<sub>4</sub> and NH<sub>2</sub>-Fe<sub>3</sub>O<sub>4</sub> are 17.1, 19.4, 3.1 and 4.5 mg/g, respectively. (The adsorption experiment was studied at 20 mg/L initial concentration of MB and 25 mg of each nanomaterials)

| Adsorbent                                                | Adsorption capacity (mg g <sup>-1</sup> )               | Reference   |
|----------------------------------------------------------|---------------------------------------------------------|-------------|
| GO-Fe <sub>3</sub> O <sub>4</sub> hybrids                | 167.2 for Methylene Blue<br>171.3 for Neutral Red       | [this work] |
| Na-ghassoulite                                           | 135 for Methylene Blue                                  | 34(a)       |
| kaolinite                                                | 76.9 for Methylene Blue                                 | 34(b)       |
| tanned solid wastes                                      | 84 for Methylene Blue                                   | 34(c)       |
| activated carbon                                         | 521 for Methylene Blue                                  | 34(d)       |
| Surfactant-Modified Zeolite                              | 6.67 for Reactive Black 5<br>15.66 for Reactive Red 239 | 34(e)       |
| Activated Carbon/Cobalt Ferrite/Alginate Composite Beads | 39.3 for Methylene Blue                                 | 34(f)       |
| MWCNTs with Fe <sub>2</sub> O <sub>3</sub>               | 42.3 for Methylene Blue<br>77.5 for Neutral Red         | 34(g)       |
| Rhizopus oryzae Biomass                                  | 39.1 for Rhodamine B                                    | 34(h)       |

Table S1. Comparison results about removal of dyes from aqueous solution.
